## Research Article

# Integrated analysis of a competing endogenous RNA network in renal cell carcinoma using bioinformatics tools

Wei-dong Jiang and  Zhi-hua Ye

Department of Urology and Hubei Key Laboratory of Kidney Disease Pathogenesis and Intervention, Huangshi Central Hospital, Affiliated Hospital of Hubei Polytechnic University, Edong Healthcare Group, Huangshi, Hubei 435000, P.R. China

**Correspondence:** Zhi-hua Ye (hszxyyzh@163.com)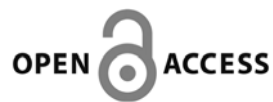

**Background:** Circular RNAs (circRNAs) are known to be closely involved in tumorigenesis and cancer progression. Nevertheless, their function and underlying mechanisms in renal cell carcinoma (RCC) remain largely unknown. The aim of the present study was to explore their expression, functions, and molecular mechanisms in RCC.

**Methods:** We downloaded the circRNA expression profiles from Gene Expression Omnibus (GEO) database, and RNA expression profiles from The Cancer Genome Atlas (TCGA) database. A ceRNA network was constructed based on circRNA–miRNA pairs and miRNA–mRNA pairs. Interactions between proteins were analyzed using the STRING database, and hub genes were identified using the cytoHubba app. We also constructed a circRNA–miRNA–hub gene regulatory module. Functional and pathway enrichment analyses were conducted using “DAVID 6.8” and R package “clusterProfiler”.

**Results:** About 6 DEcircRNAs, 17 DEmiRNAs, and 134 DEMRNAs were selected for the construction of ceRNA network of RCC. Protein–protein interaction network and module analysis identified 8 hub genes. A circRNA–miRNA–hub gene sub-network was constructed based on 3 DEcircRNAs, 4 DEmiRNAs, and 8 DEMRNAs. GO and KEGG pathway analysis indicated the possible association of DEMRNAs with RCC onset and progression.

**Conclusions:** These findings together provide a deeper understanding of the pathogenesis of RCC and suggest potential therapeutic targets.

## Introduction

Renal cell carcinoma (RCC) is one of the most common urological malignancies, accounting for 2–3% of all adult tumors, and is only secondary to bladder cancer. Its incidence is steadily increasing every year [1,2]. Despite the recent efforts in multimodal approaches, the prognosis of patients with RCC remains poor. This situation is mainly due to delayed diagnosis, high-frequent metastasis, and recurrence after surgery [3,4]. Therefore, it is important to further explore the mechanism of RCC and its metastasis, to obtain new insights in improving relevant therapy and exploring new therapeutic targets.

Circular RNAs (circRNAs) are formed by covalent closure of the 3′ and 5′ ends of an RNA molecule. Since circRNAs do not have 5′ or 3′ ends, they are resistant to exonuclease-mediated degradation and are presumed to be stabler than most linear RNAs in cells [5–8]. CircRNA is abundant in eukaryotic cells, highly conserved, and structurally stable, with a certain degree of organization, timing, and disease-specificity [7,8]. Due to these features, circRNAs have become new hotspots for research. Numerous studies have shown circular RNAs to play important regulatory roles in the development of tumor [9–11]. circRNAs have been reported to contain multiple miRNA-binding sites, with which they bind to miRNAs, also defined as ‘miRNA sponges’, leading to the inhibition of activity of miRNAs and regulation

Received: 13 April 2019  
Revised: 30 May 2019  
Accepted: 16 June 2019

Accepted Manuscript Online:  
18 June 2019  
Version of Record published:  
05 July 2019

of expression of their downstream target genes [12–14]. Liu et al. [12] found circRNA hsa\_circ\_0008039 to be highly expressed in breast cancer (BC) tissues. Circ-VANGL1 silencing inhibited cell proliferation, arrested cell-cycle progression, and reduced migration both *in vitro* and *in vivo*. E2F3 is a downstream mRNA target of miR-432-5p, and its expression is positively regulated by hsa\_circ\_0008039 and negatively by miR-432-5p expression in BC cells. Therefore, hsa\_circ\_0008039/miR-432-5p/E2F3 axis was considered as a novel essential signaling pathway involved in BC progression. Furthermore, CEP128 acts as a ceRNA to regulate SOX11 by sponging miR-145-5p, thereby reducing the inhibitory effect of miR-145-5p on SOX11 in bladder cancer [13].

In our study, we performed a joint analysis considering the array-based and sequence-based data of RCC. We successfully constructed the circRNA–miRNA–mRNA and circRNA–miRNA–hub gene networks. Furthermore, we also performed a series of analyses including protein–protein interaction (PPI) analysis and functional enrichment analysis.

## Materials and methods

### Data collection

We screened the expression profiles of circRNA in GEO datasets (<http://www.ncbi.nlm.nih.gov/gds/>) available till January 2019. The following strategy was used: (circular RNA or circRNA) and (renal cell cancer or renal cell carcinoma). We selected data according to the following criteria: each dataset included RCC tissue and adjacent normal tissues, and each group contained more than 3 samples. The GSE100186 dataset included 4 normal renal tissues and 4 RCC tissues. We also downloaded RCC transcriptome profiles from the TCGA database. Besides, the miRNAseq and mRNAseq data were also downloaded using the Data Transfer Tool (provided by GDC Apps) (<https://tcga-data.nci.nih.gov/>). The miRNA profiles contained 905 RCC tissues and 130 adjacent normal renal tissues, and the mRNA profiles contained 895 RCC tissues and 128 adjacent normal tissues. The R software package was used to process the downloaded files and to convert and reject the unqualified data. The data were calibrated, standardized, and log<sub>2</sub> transformed. No ethical approval or informed consent was required in the present study since we used the publicly available data from GEO and TCGA.

### Differential expression analysis

The differentially expressed circRNAs (DEcircRNAs) were screened using Limma package, with the criterion of  $|\log_2(\text{fold change [FC]})| > 2$  and adjusted *P*-value  $< 0.01$ . Additionally, the edgeR package was used to screen differentially expressed miRNA (DEmiRNA) and mRNA (DEmRNA) with thresholds of  $|\log_2(\text{fold change [FC]})| > 1$  and adjusted *P*-value  $< 0.05$ .

### Construction of the ceRNA network

We used the Circular RNA Interactome (CircInteractome) (<https://circinteractome.nia.nih.gov/>) database to predict the miRNA-binding sites (MREs). The target miRNAs were compared to DEmiRNA based on The Cancer Genome Atlas (TCGA); only overlapping genes were selected as candidate genes. Next, we used miRTarBase and TargetScan databases [15,16] to predict interactions between miRNA and mRNA. Only the mRNAs recognized by both databases were considered as candidate mRNAs, and were intersected with DEmRNAs to screen the DEmRNAs targeted by DEmiRNAs. The circRNA–miRNA–mRNA regulatory network was constructed using a combination of circRNA–miRNA pairs and miRNA–mRNA pairs. Finally, the network was visualized and mapped using Cytoscape v3.7.0.

### Construction of PPI network and module analysis

To assess the interactions between DEmRNAs, we constructed a PPI network using the Search Tool for the Retrieval of Interacting Genes (STRING) online tool, which can provide comprehensive interactions among proteins and genes. The cut-off criteria included a combined score of  $> 0.9$  for a PPI network and a node degree of  $\geq 3$  for screening hub genes. We next used the cytoHubba app to select modules of hub genes from the PPI network. The interaction network was visualized using Cytoscape software.

### Gene Ontology and pathway enrichment analysis

To assess the function of DEGs in the ceRNA network in tumorigenesis, we performed Gene Ontology (GO) annotation and Kyoto Encyclopedia of Genes and Genomes (KEGG) pathway analyses using the clusterProfiler package of R software [17]. *P*-value  $< 0.05$  was set as the cut-off criterion.

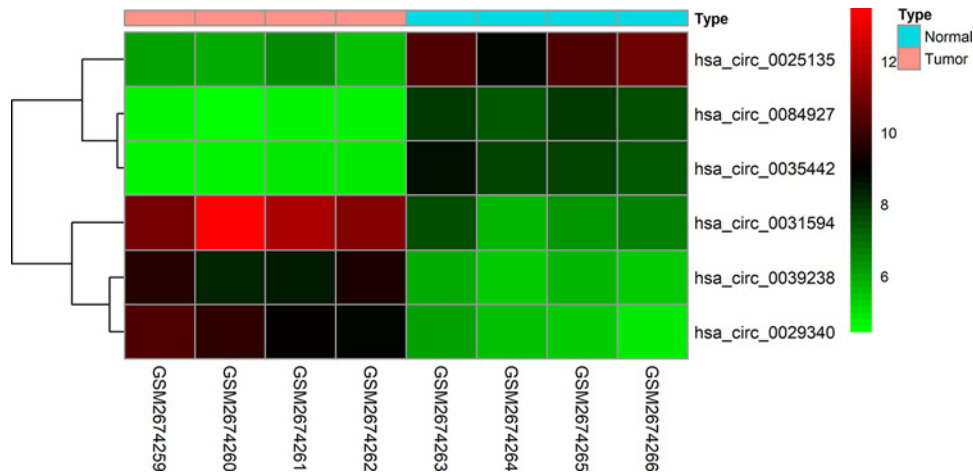

**Figure 1.** Heat map of the 8 differentially expressed circRNAs of the GSE100186 dataset

**Table 1** Basic characteristics of the 6 differently expressed circRNAs

| circRNA ID       | Position                  | Genomic length | Strand | Best transcript | Gene symbol | Regulation |
|------------------|---------------------------|----------------|--------|-----------------|-------------|------------|
| hsa_circ_0031594 | chr14:34398281-34400421   | 2140           | -      | NM_022073       | EGLN3       | Up         |
| hsa_circ_0029340 | chr12:125292306-125294835 | 2529           | -      | NM_005505       | SCARB1      | Up         |
| hsa_circ_0039238 | chr16:47162235-47165936   | 3701           | -      | NM_018092       | NETO2       | Up         |
| hsa_circ_0084927 | chr8:95676924-95677424    | 500            | +      | NM_017697       | ESRP1       | Down       |
| hsa_circ_0035442 | chr15:58284902-58287337   | 2435           | -      | NM_001206897    | ALDH1A2     | Down       |
| hsa_circ_0025135 | chr12:6458115-6465046     | 6931           | -      | NM_001159576    | SCNN1A      | Down       |

## Results

### Identification of differentially expressed genes

A total of 6 differentially expressed circRNAs (DEcircRNAs) were screened from GSE100186 dataset, including 3 up-regulated and 3 down-regulated circRNAs (Figure 1). The basic characteristics of the 6 circRNAs are listed in Table 1. Their basic structural patterns are shown in Figure 2. The DEMiRNAs and DEMRNAs, obtained from the TCGA database, were analyzed across RCC tissues and adjacent normal tissues; we identified 187 DEMiRNAs (135 up-regulated and 52 down-regulated), and 5029 DEMRNAs (3681 up-regulated and 1348 down-regulated) (Figure 3A,B).

### Construction of the ceRNA network

We used the 6 DEcircRNAs, retrieved from the CircInteractome database, and identified 90 circRNA-miRNA pairs. After intersecting with the DEMiRNAs, only 19 circRNA-miRNA pairs, including 6 circRNAs and 17 DEMiRNAs, remained. Furthermore, 833 mRNAs, predicted by both databases (miRTarBase and TargetScan), were identified; these were compared with the 5028 DEMRNAs and only overlapping genes were selected as candidate genes. Results indicated 134 DEMRNAs to be involved in ceRNA network. Finally, we constructed a ceRNA network based on 6 circRNA nodes, 17 miRNA nodes, and 134 mRNA nodes in RCC (Figure 4).

### Protein-protein network analysis

Based on the DEMRNAs, PPI network was constructed, involving 37 nodes and 50 edges (Figure 5A). In order to identify hub genes in the process of RCC carcinogenesis, closeness centrality of DEMRNAs was calculated using cytoHubba plugin, and the top 8 hub genes were found to be BUB1, RAD51, GINS2, CDC6, MELK, OIP5, PLK1, and TRIP13 (Figure 5B). We next constructed a circRNA-miRNA-hub gene sub-network (Figure 6), including 8 ceRNA regulatory modules.

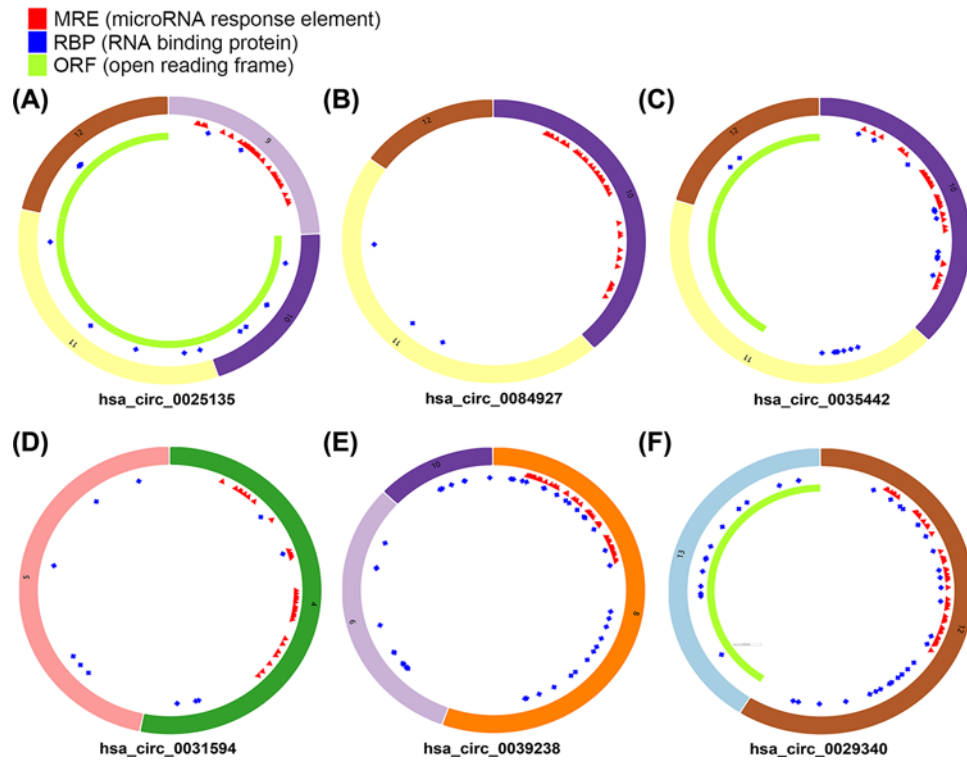

**Figure 2. Structural patterns of the 6 circRNAs by the Cancer-Specific CircRNA (CSCD, <http://gb.whu.edu.cn/CSCD/>)**  
 (A) hsa\_circ\_0025135, (B) hsa\_circ\_0084927, (C) hsa\_circ\_0035442, (D) hsa\_circ\_0031594, (E) hsa\_circ\_0039238, (F) hsa\_circ\_0029340.

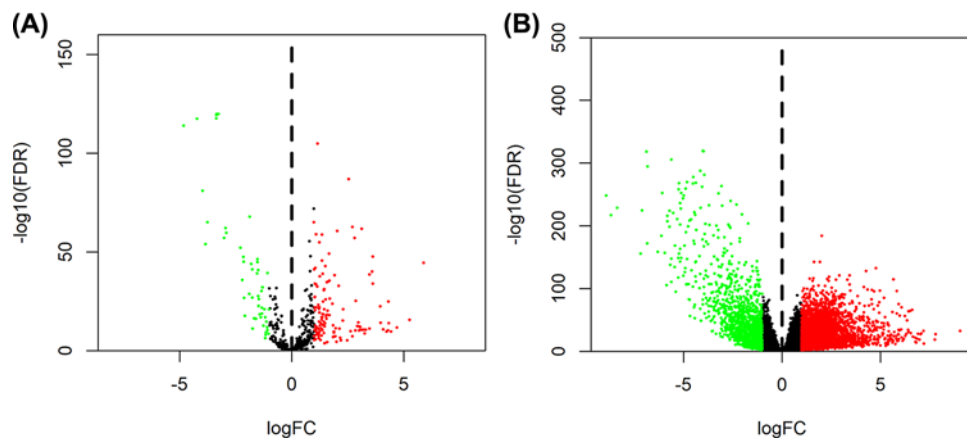

**Figure 3. Volcano plot of differentially expressed miRNAs (A) and mRNAs (B)**

### Functional assessment of DEmRNAs

Our data revealed that the mRNAs associated with biological process (BP) included those in regulation of mitotic metaphase/anaphase transition, regulation of metaphase/anaphase transition of cell cycle, metaphase/anaphase transition of mitotic cell cycle, metaphase/anaphase transition of cell cycle, and regulation of mitotic sister chromatid separation. Meanwhile, the mRNAs related to cellular components (CC) were most relevant to chromosomal region ( $P < 0.05$ ). In terms of molecular function (MF), mRNAs were mostly enriched in catalytic activity, and acting on DNA ( $P < 0.05$ ). The top five GO terms are indicated in Table 2, according to the  $P$ -value. KEGG analysis showed cell cycle pathway to be associated with the mRNAs ( $P < 0.05$ ).

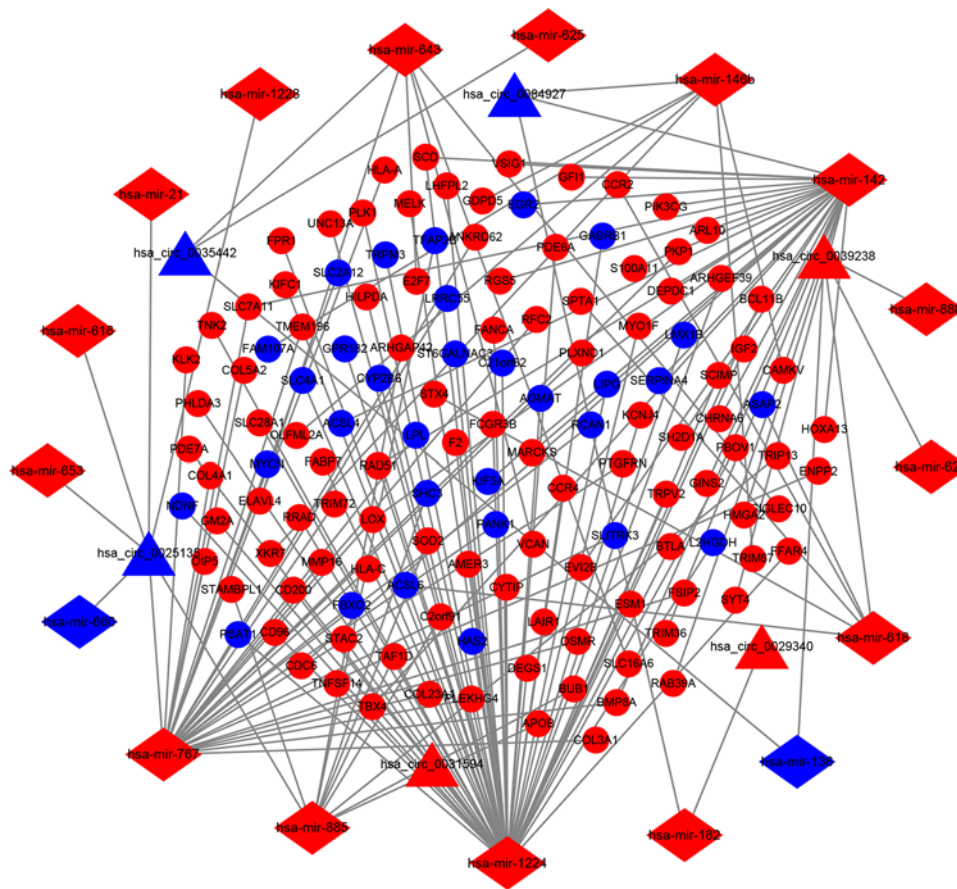

**Figure 4. The ceRNA network of circRNA–miRNA–mRNA in RCC**

The network consists of 6 circRNA nodes, 17 miRNA nodes, and 134 mRNA. Triangles indicate circRNAs, diamonds indicate miRNA, and ellipses indicate mRNA. The nodes highlighted in red and blue represent up-regulation and down-regulation, respectively.

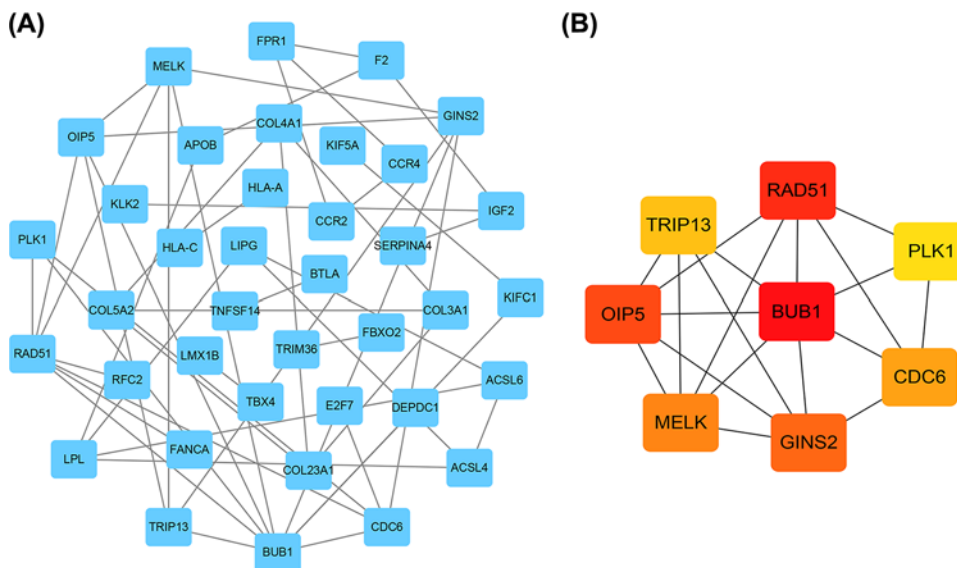

**Figure 5. Identification of hub genes from the PPI network**

(A) PPI network of 134 genes, consisting of 37 nodes and 50 edges. (B) PPI network of 8 hub genes extracted from (A). The node color changes gradually from yellow to red in ascending order according to the  $\log_2(\text{foldchange})$  of genes.



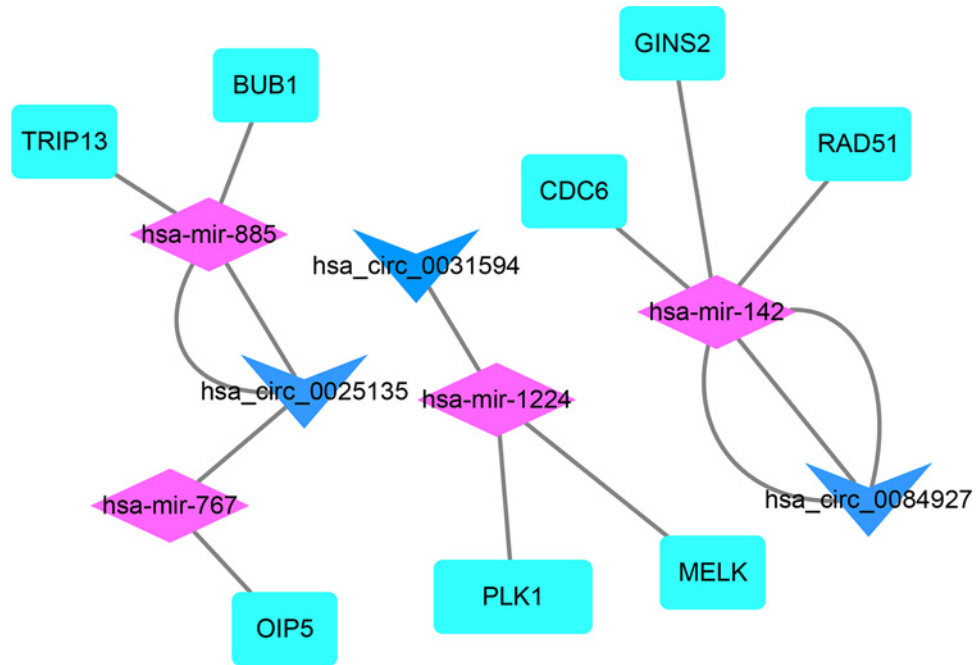

**Figure 6. CircRNA-miRNA-hub gene network**

The network consists of 3 circRNAs, 4 miRNAs, and 8 hub genes. Vs indicate circRNAs, diamonds indicate miRNA, and round rectangles indicate mRNA.

**Table 2 The top 5 GO terms enriched by DEmRNA involved in the ceRNA network**

| Categories | Terms      | Description                                               | P-value  | P-adjusted | Genes            | Counts |
|------------|------------|-----------------------------------------------------------|----------|------------|------------------|--------|
| BP         | GO:0030071 | Regulation of mitotic metaphase/anaphase transition       | 1.05E-06 | 7.64E-05   | BUB1/CDC6/TRIP13 | 3      |
|            | GO:1902099 | Regulation of metaphase/anaphase transition of cell cycle | 1.11E-06 | 7.64E-05   | BUB1/CDC6/TRIP13 | 3      |
|            | GO:0007091 | Metaphase/anaphase transition of mitotic cell cycle       | 1.26E-06 | 7.64E-05   | BUB1/CDC6/TRIP13 | 3      |
|            | GO:0044784 | Metaphase/anaphase transition of cell cycle               | 1.34E-06 | 7.64E-05   | BUB1/CDC6/TRIP13 | 3      |
|            | GO:0010965 | Regulation of mitotic sister chromatid separation         | 1.50E-06 | 7.64E-05   | BUB1/CDC6/TRIP13 | 3      |
| CC         | GO:0098687 | Chromosomal region                                        | 0.000331 | 0.007594   | BUB1/RAD51/OIP5  | 3      |
|            | GO:0005657 | Replication fork                                          | 0.00037  | 0.007594   | RAD51/GINS2      | 2      |
|            | GO:0000794 | Condensed nuclear chromosome                              | 0.000716 | 0.009784   | BUB1/RAD51       | 2      |
|            | GO:0000775 | Chromosome, centromeric region                            | 0.002878 | 0.024971   | BUB1/OIP5        | 2      |
|            | GO:0000793 | Condensed chromosome                                      | 0.003585 | 0.024971   | BUB1/RAD51       | 2      |
| MF         | GO:0140097 | Catalytic activity, acting on DNA                         | 0.003358 | 0.032713   | RAD51/GINS2      | 2      |
|            | GO:0043138 | 3'-5' DNA helicase activity                               | 0.005912 | 0.032713   | GINS2            | 1      |
|            | GO:0043142 | Single-stranded DNA-dependent ATPase activity             | 0.005912 | 0.032713   | RAD51            | 1      |
|            | GO:0000400 | Four-way junction DNA binding                             | 0.007272 | 0.032713   | RAD51            | 1      |
|            | GO:0034185 | Apolipoprotein binding                                    | 0.007272 | 0.032713   | LPL              | 1      |

## Discussion

Abnormal expression of non-coding RNAs plays an important role in the development and progression of multiple tumors [18,19]. With the advent of high-throughput sequencing technologies in recent years, along with the continuous maturity and development of bioinformatics, circRNAs have been increasingly identified in multiple species. The discovery of circRNA expands our knowledge of the types and functions of non-coding RNA family. Several studies have unveiled the mechanism of participation of circRNAs in the regulation of malignant biological processes [20,21]. CircRNAs have been shown to be associated with the development of different tumors, thus implying their potential to serve as biomarkers of malignancies [22–24]. However, the exact role of circRNAs in RCC still remains largely unclear. In the present study, we first integrated circRNA, miRNA, and mRNA data of RCC tissues and non-tumor tissues from Gene Expression Omnibus (GEO) datasets and TCGA database, and constructed the circRNA–miRNA–mRNA regulatory network.

Several studies have shown the expression level of circRNA to be dysregulated in RCC, and to be associated with pathogenesis and prognosis, thus suggesting them as potential tumor-associated biomarkers [25–27]. Wang et al. [25] analyzed 52 pairs of RCC samples and normal renal samples and found hsa\_circ\_0001451 to be significantly down-regulated in RCC tissues, besides being linked to clinicopathological features and OS. *In vitro* silencing of Hsa\_circ\_0001451 promoted tumor growth; therefore, hsa\_circ\_0001451 may be a potential prognostic biomarker for RCC. Similarly, elevated circPCNXL2 was observed in RCC tissues and was associated with poor OS of patients with RCC. Knockdown of circPCNXL2 inhibited proliferation and *in vitro* invasion, and reduced tumor growth *in vivo*. Furthermore, circPCNXL2 was found to bind to miR-153 as an miRNA sponge to regulate the expression of ZEB2 in RCC progression [26]. In our study, a total of 6 circRNAs (hsa\_circ\_0084927, hsa\_circ\_0029340, hsa\_circ\_0035442, hsa\_circ\_0025135, hsa\_circ\_0039238, and hsa\_circ\_0031594) were identified to be involved in the ceRNA network. Among them, hsa\_circ\_0084927 was found to be up-regulated in lung adenocarcinoma-associated malignant pleural effusion and was used to construct the ceRNA network [28]. However, none of the other 5 circRNAs has yet been reported.

MiRNAs regulate approximately 60% of human genes, including proto-oncogenes and tumor suppressors, suggesting the correlation between miRNAs and tumors. MiRNAs form a large class of endogenous non-coding RNAs that are 19–25 nucleotides in length, regulating cell proliferation, differentiation, apoptosis, and migration [29]. They can bind to the 3' untranslated region (UTR) of the target gene by means of partial pairing of base pairs to inhibit the expression of target gene at post-transcriptional level [30]. In the present study, we identified 17 DE miRNAs in the ceRNA network. Among them, several miRNAs have been reported to play important roles in the initiation and development of RCC, such as miR-182, miR-136, and miR-629 [31–33]. To further identify the key circRNAs participating in the regulatory network, we established the PPI network, thereby screening 8 hub genes. GO and KEGG pathway analysis suggested these DE miRNAs to be involved in many important tumor-associated biological functions and pathways. Furthermore, we established circRNA–miRNA–hub gene network, including 8 circRNA–miRNA–mRNA axes. However, since the results are based on bioinformatics, further in-depth studies would be recommended to verify the possible role of the 8 axes in RCC.

## Conclusions

We obtained the expression profiles of RNAs and constructed ceRNA networks by analyzing the data from GEO and TCGA. Our study provides novel insights into the circRNA-related ceRNA network in RCC and suggests potential therapeutic targets.

### Funding

The authors declare that there are no sources of funding to be acknowledged.

### Author Contribution

All authors have contributed in the design, analysis, and drafting and approval of the final manuscript.

### Competing Interests

The authors declare that there are no competing interests associated with the manuscript.

### Abbreviations

CircRNA, circular RNA; RCC, renal cell carcinoma.

## References

- 1 Siegel, R.L., Miller, K.D. and Jemal, A. (2018) Cancer statistics, 2018. *CA Cancer J. Clin.* **68**, 7–30, <https://doi.org/10.3322/caac.21442>
- 2 Znaor, A., Lortet-Tieulent, J., Laversanne, M., Jemal, A. and Bray, F. (2015) International variations and trends in renal cell carcinoma incidence and mortality. *Eur. Urol.* **67**, 519–530, <https://doi.org/10.1016/j.eururo.2014.10.002>
- 3 Cella, D., Grunwald, V., Nathan, P. et al. (2016) Quality of life in patients with advanced renal cell carcinoma given nivolumab versus everolimus in CheckMate 025: a randomised, open-label, phase 3 trial. *Lancet Oncol.* **17**, 994–1003, [https://doi.org/10.1016/S1470-2045\(16\)30125-5](https://doi.org/10.1016/S1470-2045(16)30125-5)
- 4 Wu, Y., Wang, Y.Q., Weng, W.W. et al. (2016) A serum-circulating long noncoding RNA signature can discriminate between patients with clear cell renal cell carcinoma and healthy controls. *Oncogenesis* **5**, e192, <https://doi.org/10.1038/oncsis.2015.48>
- 5 Qu, S., Yang, X., Li, X. et al. (2015) Circular RNA: a new star of noncoding RNAs. *Cancer Lett.* **365**, 141–148, <https://doi.org/10.1016/j.canlet.2015.06.003>
- 6 Petkovic, S. and Muller, S. (2015) RNA circularization strategies in vivo and in vitro. *Nucleic Acids Res.* **43**, 2454–2465, <https://doi.org/10.1093/nar/gkv045>
- 7 Jeck, W.R., Sorrentino, J.A., Wang, K. et al. (2013) Circular RNAs are abundant, conserved, and associated with ALU repeats. *RNA* **19**, 141–157, <https://doi.org/10.1261/rna.035667.112>
- 8 Rybak-Wolf, A., Stottmeister, C., Glazar, P. et al. (2015) Circular RNAs in the mammalian brain are highly abundant, conserved, and dynamically expressed. *Mol. Cell* **58**, 870–885, <https://doi.org/10.1016/j.molcel.2015.03.027>
- 9 Lv, C., Sun, L., Guo, Z. et al. (2018) Circular RNA regulatory network reveals cell-cell crosstalk in acute myeloid leukemia extramedullary infiltration. *J. Transl. Med.* **16**, 361, <https://doi.org/10.1186/s12967-018-1726-x>
- 10 Zhang, H., Deng, T., Ge, S. et al. (2018) Exosome circRNA secreted from adipocytes promotes the growth of hepatocellular carcinoma by targeting deubiquitination-related USP7. *Oncogene* **13**, 2844–2859
- 11 Chen, N., Zhao, G., Yan, X. et al. (2018) A novel FLI1 exonic circular RNA promotes metastasis in breast cancer by coordinately regulating TET1 and DNMT1. *Genome Biol.* **19**, 218, <https://doi.org/10.1186/s13059-018-1594-y>
- 12 Liu, Y., Lu, C., Zhou, Y., Zhang, Z. and Sun, L. (2018) Circular RNA hsa.circ.0008039 promotes breast cancer cell proliferation and migration by regulating miR-432-5p/E2F3 axis. *Biochem. Biophys. Res. Commun.* **502**, 358–363, <https://doi.org/10.1016/j.bbrc.2018.05.166>
- 13 Wu, Z., Huang, W., Wang, X. et al. (2018) Circular RNA CEP128 acts as a sponge of miR-145-5p in promoting the bladder cancer progression via regulating SOX11. *Mol. Med.* **24**, 40, <https://doi.org/10.1186/s10020-018-0039-0>
- 14 Fang, G., Ye, B.L., Hu, B.R., Ruan, X.J. and Shi, Y.X. (2018) CircRNA\_100290 promotes colorectal cancer progression through miR-516b-induced downregulation of FZD4 expression and Wnt/beta-catenin signaling. *Biochem. Biophys. Res. Commun.* **504**, 184–189, <https://doi.org/10.1016/j.bbrc.2018.08.152>
- 15 Wong, N. and Wang, X. (2015) miRDB: an online resource for microRNA target prediction and functional annotations. *Nucleic Acids Res.* **43**, D146–D152, <https://doi.org/10.1093/nar/gku1104>
- 16 Fromm, B., Billipp, T., Peck, L.E. et al. (2015) A uniform system for the annotation of vertebrate microRNA genes and the evolution of the human microRNAome. *Annu. Rev. Genet.* **49**, 213–242, <https://doi.org/10.1146/annurev-genet-120213-092023>
- 17 Yu, G., Wang, L.G., Han, Y. and He, Q.Y. (2012) clusterProfiler: an R package for comparing biological themes among gene clusters. *OMICS* **16**, 284–287, <https://doi.org/10.1089/omi.2011.0118>
- 18 Dong, P., Xiong, Y., Yue, J. et al. (2018) Long non-coding RNA NEAT1: a novel target for diagnosis and therapy in human tumors. *J. Cell. Mol. Med.* **9**, 471
- 19 Bi, W., Huang, J., Nie, C. et al. (2018) CircRNA circRNA\_102171 promotes papillary thyroid cancer progression through modulating CTNNBIP1-dependent activation of beta-catenin pathway. *J. Exp. Clin. Cancer Res.* **37**, 275, <https://doi.org/10.1186/s13046-018-0936-7>
- 20 Zhou, B., Zheng, P. and Li, Z. (2018) CircPCNXL2 sponges miR-153 to promote the proliferation and invasion of renal cancer cells through upregulating ZEB2. *J. Transl. Med.* **17**, 2644–2654
- 21 Lv, C., Sun, L., Guo, Z. et al. (2018) Circular RNA regulatory network reveals cell-cell crosstalk in acute myeloid leukemia extramedullary infiltration. *J. Transl. Med.* **16**, 361, <https://doi.org/10.1186/s12967-018-1726-x>
- 22 Jin, Y., Yu, L.L., Zhang, B., Liu, C.F. and Chen, Y. (2018) Circular RNA hsa.circ.0000523 regulates the proliferation and apoptosis of colorectal cancer cells as miRNA sponge. *Braz. J. Med. Biol. Res.* **51**, e7811, <https://doi.org/10.1590/1414-431x20187811>
- 23 Zhang, X., Xu, Y., Qian, Z. et al. (2018) circRNA\_104075 stimulates YAP-dependent tumorigenesis through the regulation of HNF4a and may serve as a diagnostic marker in hepatocellular carcinoma. *Cell Death Dis.* **9**, 1091, <https://doi.org/10.1038/s41419-018-1132-6>
- 24 Yu, H., Chen, Y. and Jiang, P. (2018) Circular RNA HIPK3 exerts oncogenic properties through suppression of miR-124 in lung cancer. *Biochem. Biophys. Res. Commun.* **506**, 455–462, <https://doi.org/10.1016/j.bbrc.2018.10.087>
- 25 Wang, G., Xue, W., Jian, W. et al. (2018) The effect of Hsa.circ.0001451 in clear cell renal cell carcinoma cells and its relationship with clinicopathological features. *J. Cancer* **9**, 3269–3277, <https://doi.org/10.7150/jca.25902>
- 26 Zhou, B., Zheng, P., Li, Z. et al. (2018) CircPCNXL2 sponges miR-153 to promote the proliferation and invasion of renal cancer cells through upregulating ZEB2. *Cell Cycle* **17**, 2644–2654, <https://doi.org/10.1080/15384101.2018.1553354>
- 27 Han, Z., Zhang, Y., Sun, Y. et al. (2018) ERbeta-mediated alteration of circATP2B1 and miR-204-3p signaling promotes invasion of clear cell renal cell carcinoma. *Cancer Res.* **78**, 2550–2563, <https://doi.org/10.1158/0008-5472.CAN-17-1575>
- 28 Hou, Z., Wen, Y., Wang, Y., Xing, Z. and Liu, Z. (2018) Microarray expression profile and analysis of circular RNA regulatory network in malignant pleural effusion. *Cell Cycle* **17**, 2819–2832
- 29 Bartel, D.P. (2018) Metazoan MicroRNAs. *Cell* **173**, 20–51, <https://doi.org/10.1016/j.cell.2018.03.006>
- 30 Bartel, D.P. (2009) MicroRNAs: target recognition and regulatory functions. *Cell* **136**, 215–233, <https://doi.org/10.1016/j.cell.2009.01.002>



- 31 Wang, X., Li, H., Cui, L., Feng, J. and Fan, Q. (2016) MicroRNA-182 suppresses clear cell renal cell carcinoma migration and invasion by targeting IGF1R. *Neoplasma* **63**, 717–725, <https://doi.org/10.4149/neo`2016`508>
- 32 Chen, P., Zhao, L., Pan, X. et al. (2018) Tumor suppressor microRNA-136-5p regulates the cellular function of renal cell carcinoma. *Oncol. Lett.* **15**, 5995–6002
- 33 Jingushi, K., Ueda, Y., Kitae, K. et al. (2015) miR-629 targets TRIM33 to promote TGFbeta/Smad signaling and metastatic phenotypes in ccRCC. *Mol. Cancer Res.* **13**, 565–574, <https://doi.org/10.1158/1541-7786.MCR-14-0300>
